# Supplementary material for: Single-cell transcriptome sequencing on the Nanopore platform with ScNapBar
Source: PubMed Central journal article supplement — RNA. 2021 Jul;27(7):763–70. doi: 10.1261/rna.078154.120 (PMC8208055; doi:10.1261/rna.078154.120), 2021-07
Supplement: supp_078154.120_Supplemental_Tables.pdf [file supp_078154.120_Supplemental_Tables.pdf]

# Supplementary Tables: Single cell transcriptome sequencing on the Nanopore platform with ScNapBar

Qi Wang<sup>1</sup>, Sven Bönigk<sup>1</sup>, Volker Böhm<sup>2,3</sup>, Niels Gehring<sup>2,3</sup>, Janine Altmüller<sup>4</sup>, and Christoph Dieterich<sup>\*1,5,6</sup>

<sup>1</sup>Klaus Tschira Institute for Integrative Computational Cardiology, University Hospital Heidelberg, 69120 Heidelberg, Germany

<sup>2</sup>Institute for Genetics, University of Cologne, 50674 Köln, Germany

<sup>3</sup>Center for Molecular Medicine Cologne (CMMC), University of Cologne, 50937 Köln, Germany

<sup>4</sup>Cologne Center for Genomics (CCG), University of Cologne, Weyertal 115b, 50931 Köln, Germany

<sup>5</sup>Department of Internal Medicine III (Cardiology, Angiology, and Pneumology), University Hospital Heidelberg, 69120 Heidelberg, Germany

<sup>6</sup>German Centre for Cardiovascular Research (DZHK)-Partner Site Heidelberg/Mannheim, 69120 Heidelberg, Germany

Table S1: Odds ratio from Fisher's test on the number of the correct and wrong barcode assignment.

|                                                | Sicelore | ScNapBar |
|------------------------------------------------|----------|----------|
| Barcode start positions $\geq$ 3-nt            | 24.797 * | 0.141 *  |
| Number of mismatches $\geq$ 2                  | 5.881 *  | 3.646 *  |
| Number of indels $\geq$ 2                      | 12.607 * | 7.894 *  |
| Highest barcode occurrence in multiple matches | 2.161 *  | 3.613 *  |

\* p-value <0.01.

---

\*christoph.dieterich@uni-heidelberg.de

Table S2: Cell Ranger Summary.

---

|                            |            |
|----------------------------|------------|
| Number of Reads            | 80,860,737 |
| Estimated Number of Cells  | 2,052      |
| Mean Reads per Cell        | 39,405     |
| Median Genes per Cell      | 4,064      |
| Total Genes Detected       | 18,266     |
| Median UMI Counts per Cell | 15,791     |
| Valid Barcodes             | 97.1%      |
| Valid UMIs                 | 93.6%      |
| Sequencing Saturation      | 11.3%      |
| Q30 Bases in Barcode       | 96.6%      |
| Q30 Bases in UMI           | 96.5%      |
| Q30 Bases in RNA Read      | 94.9%      |
| Reads Mapped to Genome     | 96.1%      |
| Fraction Reads in Cells    | 85.1%      |

---
